# Supplementary figures and images for: LifeLab: Co-Design of an Interactive Health Literacy Intervention for Socioeconomically Disadvantaged Adolescents’
Source: MDPI journal article supplement (doi:10.3390/children9081230), 2022-08-15

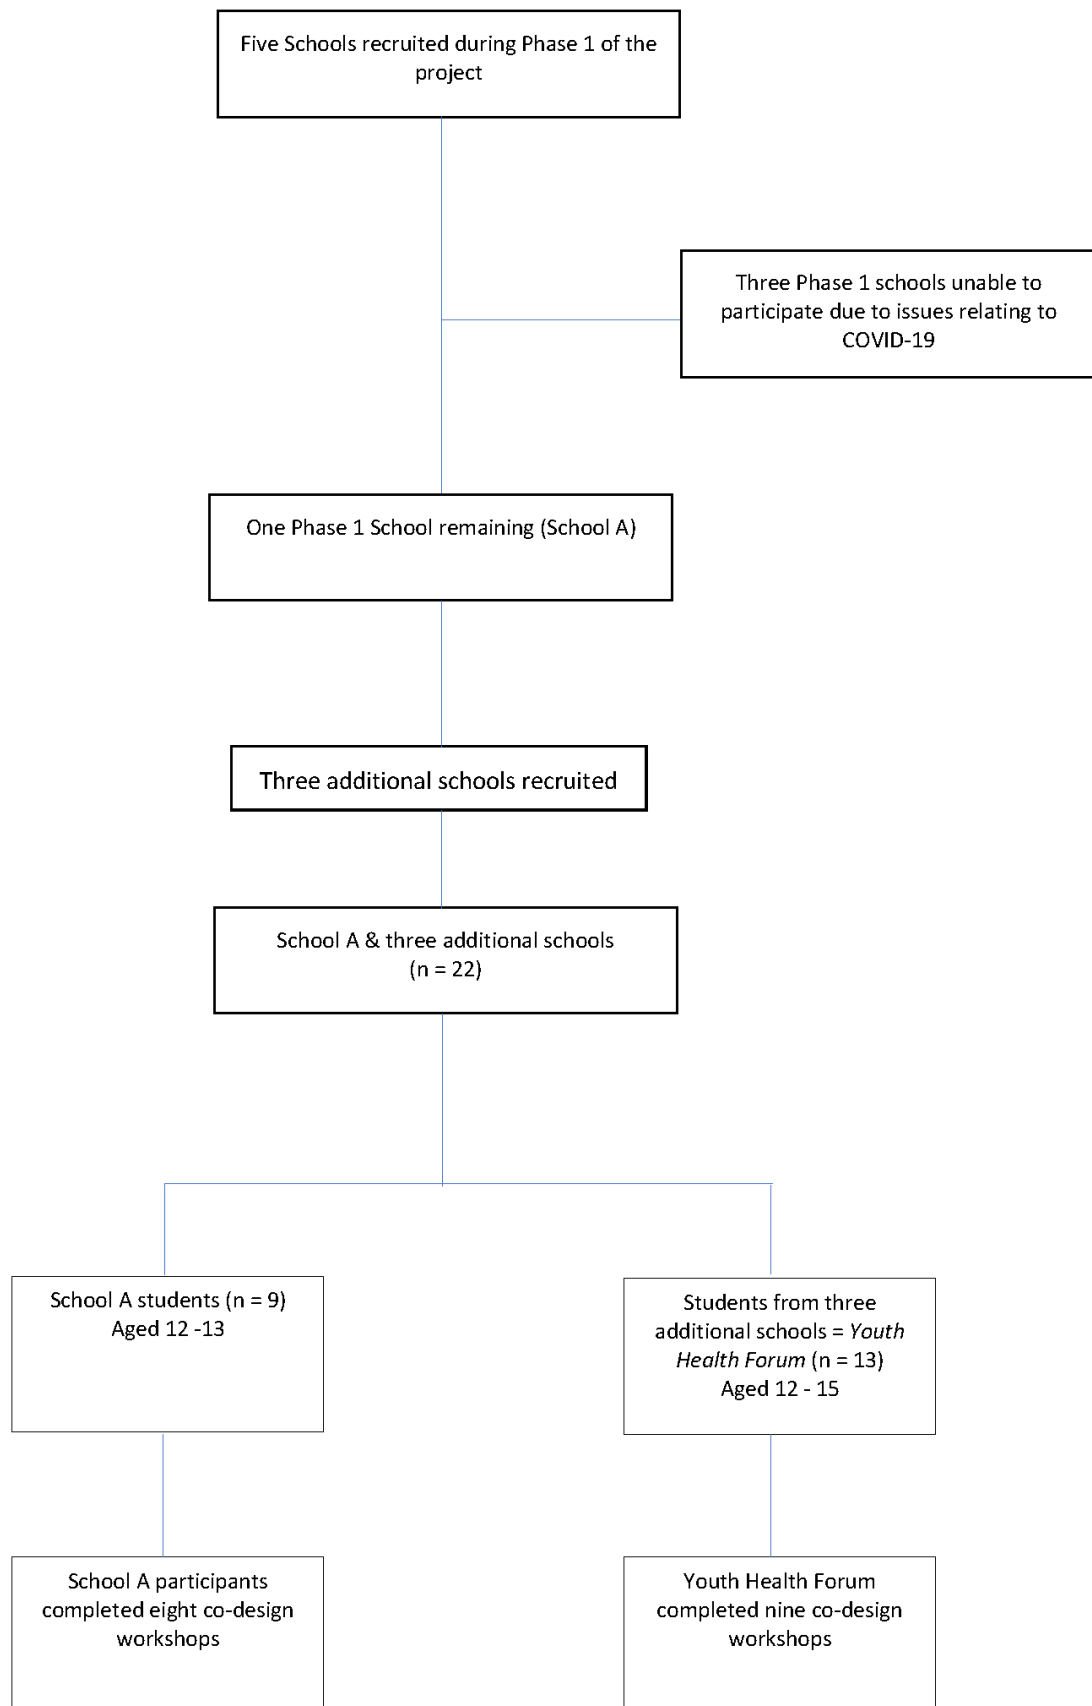

Figure S1: Flow diagram for participant recruitment.

Supplement: s1 [file s1]
